# Supplementary material
Source: HighWire-hosted journal article supplement (https://bmjopen.bmj.com/content/10/2/e030738)
Supplement: inline-supplementary-material-2 [file inline-supplementary-material-2.pdf]

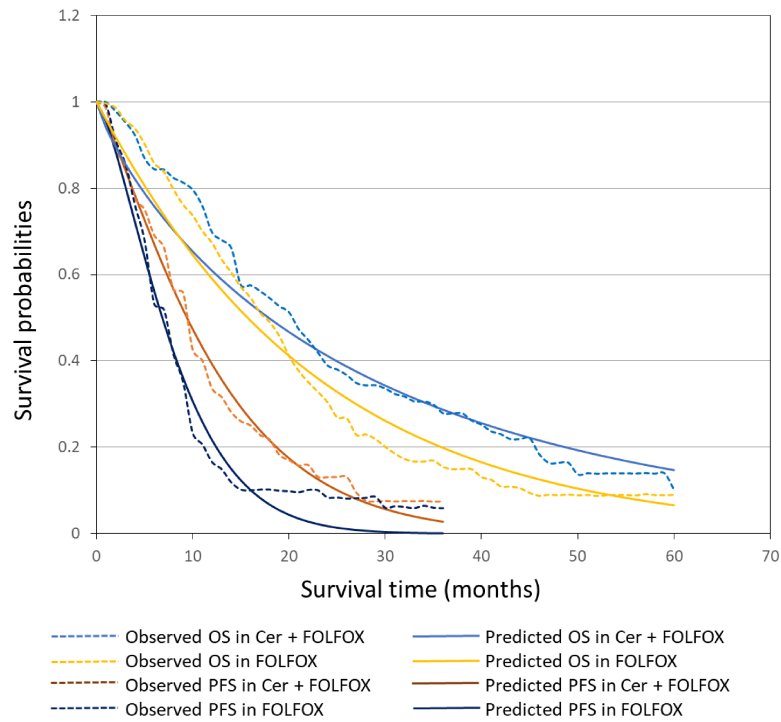

Figure S1. Calibration curve: progression-free and overall survival. Predicted data (dotted line) were plotted along with the observed data from TAILOR trial (solid line).
